# Supplementary material for: Pro-Inflammatory Biomarkers Combined with Body Composition Display a Strong Association with Knee Osteoarthritis in a Community-Based Study
Source: MDPI journal article supplement (doi:10.3390/biom13091315), 2023-08-28
Supplement: s1 [file s1]

**Table S1.** Basic descriptive statistics of study variables by gender and disease status.

|                            | <b>Males</b>                |                       | <b>Females</b>             |                       |
|----------------------------|-----------------------------|-----------------------|----------------------------|-----------------------|
| <b>Variables</b>           | <b>Control<br/>(N= 251)</b> | <b>KOA<br/>(N=30)</b> | <b>Control<br/>(N=268)</b> | <b>KOA<br/>(N=68)</b> |
| Age (y)                    | 52.12±0.59                  | 53.63±2.10            | 51.70±0.49                 | 57.27±1.24            |
| WHR                        | 0.95±0.004                  | 0.96±0.01             | 0.91±0.005                 | 0.93±0.01             |
| BMI (kg/m <sup>2</sup> )   | 28.09±0.24                  | 30.11±0.81            | 31.03±0.33                 | 33.38±0.60            |
| FM/WT                      | 0.26±0.003                  | 0.29±0.01             | 0.39±0.003                 | 0.41±0.006            |
| SMM/WT                     | 0.36±0.002                  | 0.34±0.007            | 0.25±0.002                 | 0.24±0.003            |
| hs-CRP (mg/L)              | 2.31±0.49                   | 2.68±1.46             | 0.84±0.16                  | 3.99±1.02             |
| SII (×10 <sup>9</sup> /L ) | 459.79±21.55                | 604.42±90.71          | 450.32±17.47               | 618.51±46.31          |
| Vaspin (pg/ml)             | 1705.10±351.54              | 3754.39±1474.85       | 1285.21±292.90             | 3255.21±870.10        |
| Follistatin (pg/ml)        | 594.40±25.89                | 688.22±60.86          | 615.53±32.34               | 788.17±81.26          |
| Activin A (pg/ml)          | 1018.46±76.90               | 1087.16±246.74        | 1343.31±109.92             | 2157.81±322.09        |
| FSTL1 (ng/ml)              | 14.04±0.37                  | 13.69±0.76            | 13.96±0.29                 | 12.73±0.54            |

Data are presented as mean ± standard deviations; N, sample size; WHR, waist-hip-ratio; BMI, body mass index; FM/WT, fat mass/weight ratio; SMM/WT, skeletal muscle mass/weight ratio; hs-CRP, high-sensitivity C-reactive protein; SII, systemic immune-inflammation index.
